# Supplementary material for: Regulation of the alveolar regenerative niche by amphiregulin-producing regulatory T cells
Source: PubMed Central journal article supplement — J Exp Med. 2022 Dec 19;220(3):e20221462. doi: 10.1084/jem.20221462 (PMC9767680; doi:10.1084/jem.20221462), 2022-12-19

Fig. 4D

10.5  
(1)  
7/9/20  
 $\beta$ -Actin

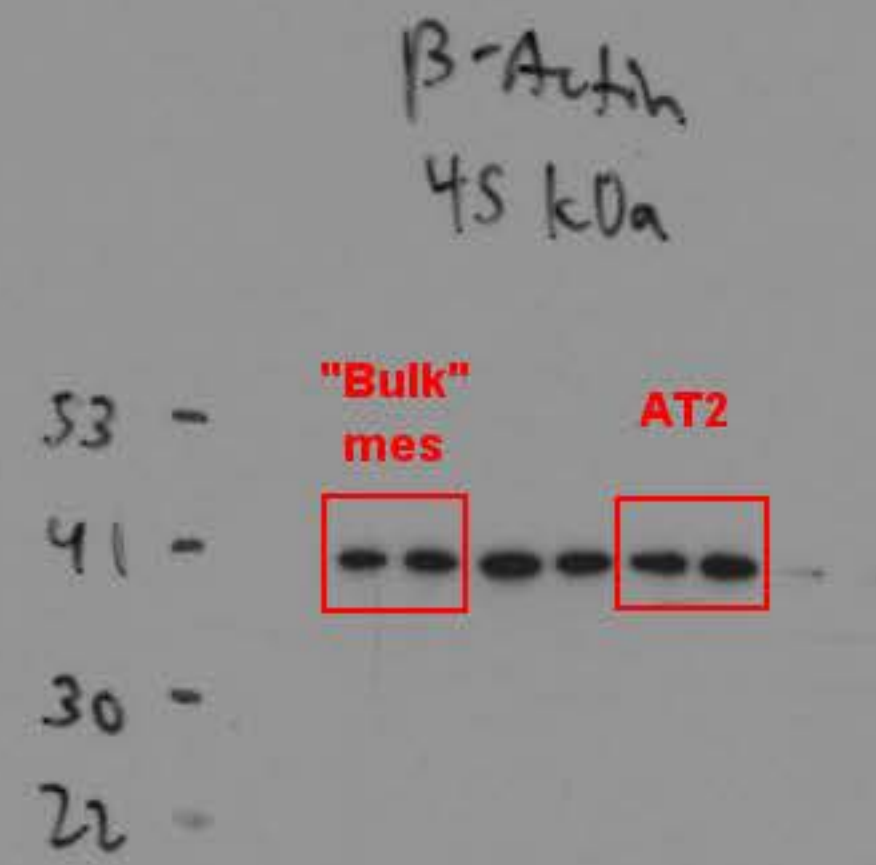

Fig. 4D

10 min  
(3, later)  
7/11/00  
Egfr

Egfr, 175 kDa

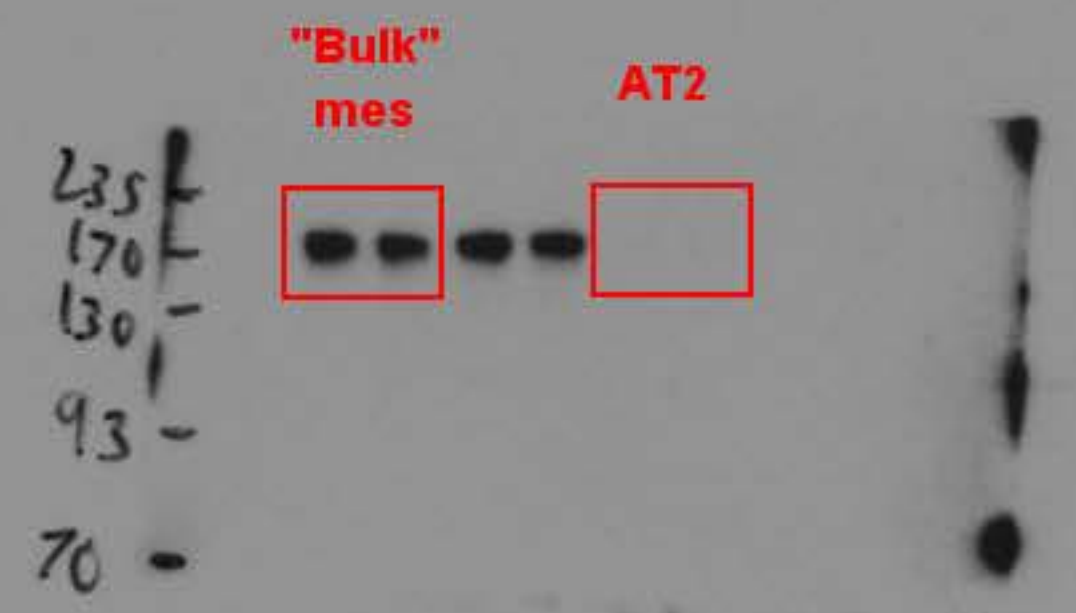

Fig. 4I

11/26/19  
β-Actin/Egfr  
From tub. lve  
Exp 2  
30 min  
(1.2)

β-Actin  
45 kDa

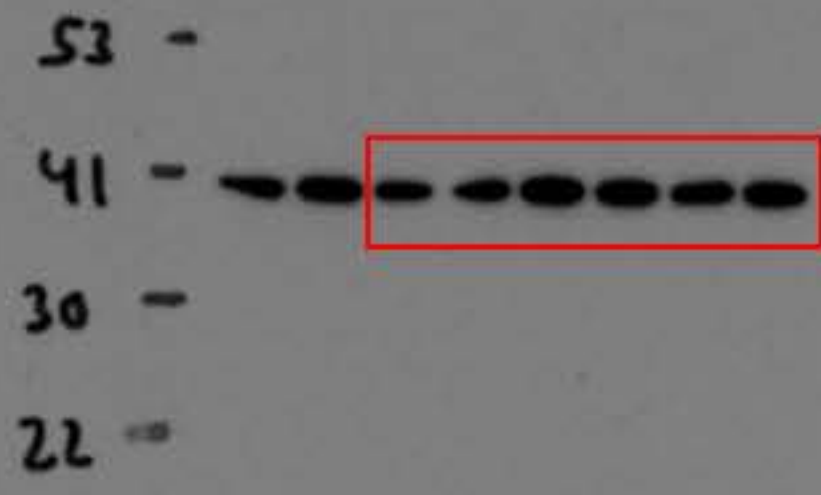

Egfr  
175 kDa

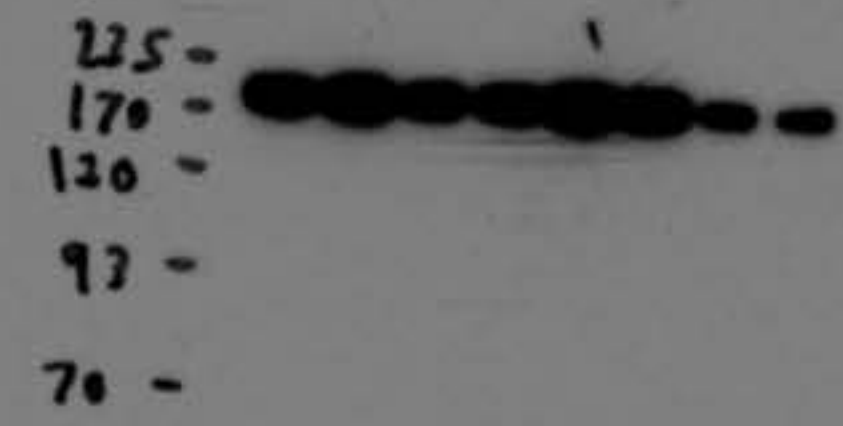

Fig. 41

11/26/99  
β-Actin/Egfr  
From Test Gen  
Exp 3  
30 min  
(1.3)

β-Actin  
45 kDa

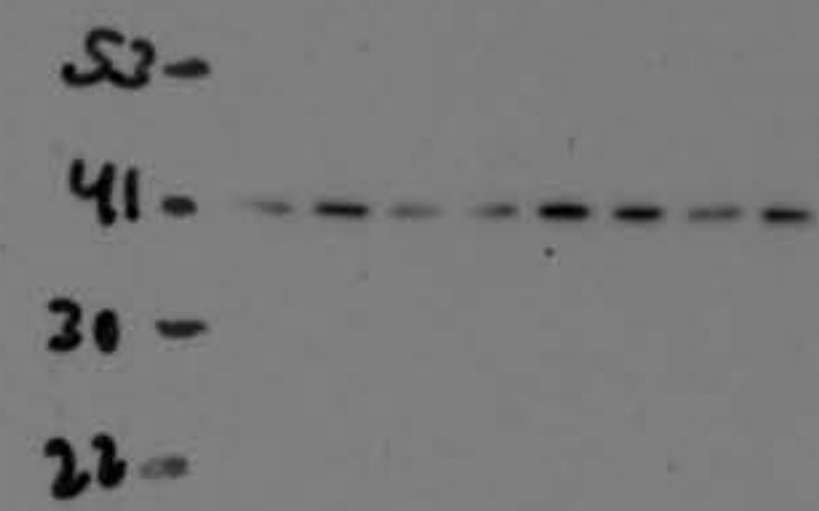

Egfr  
175 kDa

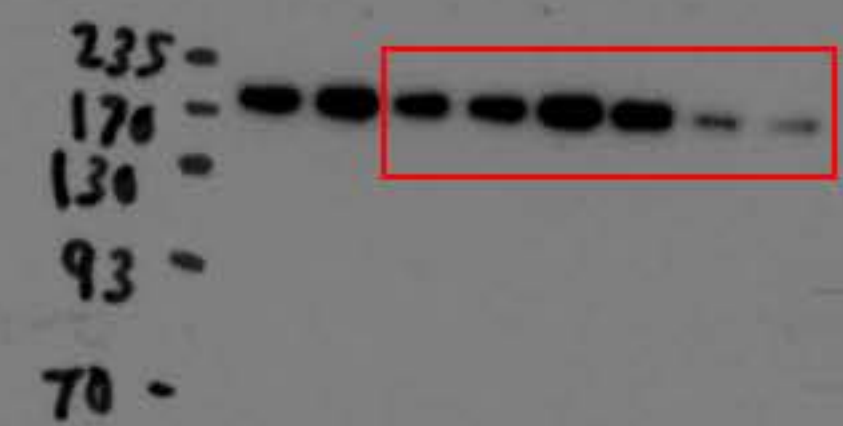

Supplement: JEM_20221462_SourceDataF4.pdf [file JEM_20221462_SourceDataF4.pdf]
