# Supplementary material for: Regulation of the alveolar regenerative niche by amphiregulin-producing regulatory T cells
Source: PubMed Central journal article supplement — J Exp Med. 2022 Dec 19;220(3):e20221462. doi: 10.1084/jem.20221462 (PMC9767680; doi:10.1084/jem.20221462), 2022-12-19

Fig. 5E

exp 9/24/20  
Western 12/18/20  
AFU/mer subjects  
touch  
(3)  
(after 15 min)

$\beta$ -Actin  
45 kDa

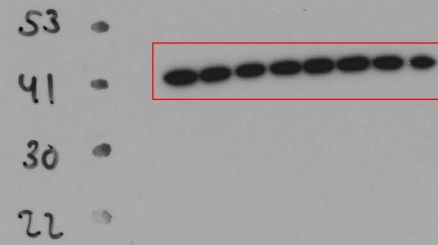

Fig. 5E

Exp 9/24/20  
Western 12/18/20  
AECL/mes substrate  
20 min  
(1.2)

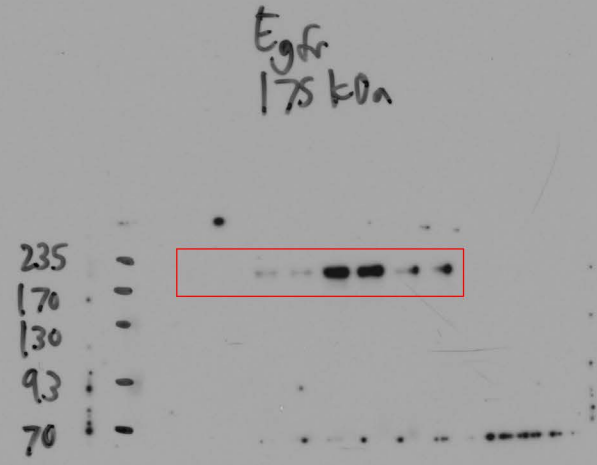

Supplement: JEM_20221462_SourceDataF5.pdf [file JEM_20221462_SourceDataF5.pdf]
