# Supplementary material for: Regulation of the alveolar regenerative niche by amphiregulin-producing regulatory T cells
Source: PubMed Central journal article supplement — J Exp Med. 2022 Dec 19;220(3):e20221462. doi: 10.1084/jem.20221462 (PMC9767680; doi:10.1084/jem.20221462), 2022-12-19
Supplement: JEM_20221462_SourceDataFS5.pdf [file JEM_20221462_SourceDataFS5.pdf]

**Fig. S5A**

**EGFR**  
**175 kDa**

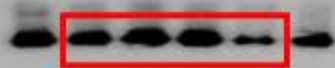

Fig. S5A

10 sec  
ECL+

2 CAPOM

Col7a2 tamoxifen treat  
gel & transfer run by  
KENTON  
5/30/19  
SAC on 5/14/19

55 -  
75 -  
25 -  
20 -  
15 -

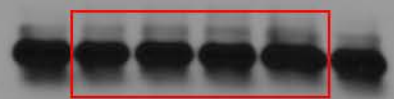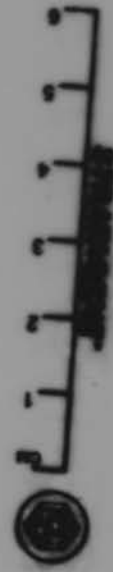

SAC on 5/14/19

$\alpha$  PEGFR

Colza2 tamoxifen  
test

gel & transfer run

by Kenia

5/30/19

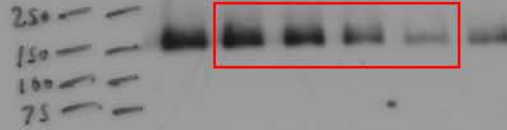

Fig. S5A

① WT/PL no  
TMX

② PL/PL cre-  
+ 1mg TMX

③ PL/PL cre+  
+ oil

④ male PL/PL cre+  
+ 1mg

⑤ female PL/PL cre+  
+ 2mg

⑥ female PL/PL cre+  
+ 1mg
