# Supplementary material for: Regulation of the alveolar regenerative niche by amphiregulin-producing regulatory T cells
Source: PubMed Central journal article supplement — J Exp Med. 2022 Dec 19;220(3):e20221462. doi: 10.1084/jem.20221462 (PMC9767680; doi:10.1084/jem.20221462), 2022-12-19
Supplement: JEM_20221462_TableS1.pdf [file JEM_20221462_TableS1.pdf]

**Table S1. Marker genes of mesenchymal cell clusters.** Top 50 marker genes defining mesenchymal cell clusters generated from the integration of scRNA-Seq data of lung mesenchymal cells from untreated (Zepp et al., 2017), *Areg<sup>f/f</sup>* + PR8/H1N1 dpi 8, and *Areg<sup>f/f</sup>* CD4-cre + PR8/H1N1 dpi 8 animals.

| Cluster 1<br>Col13_1 | Cluster 2<br>Col14 | Cluster 3<br>Mes_1 | Cluster 4<br>Col13_2 | Cluster 5<br>Hhip+   | Cluster 6<br>Col13_14 | Cluster 7<br>Smooth muscle | Cluster 8<br>Mes_2   | Cluster 9<br>Mesothelial | Cluster 10<br>Pericyte |
|----------------------|--------------------|--------------------|----------------------|----------------------|-----------------------|----------------------------|----------------------|--------------------------|------------------------|
| <i>Inmt</i>          | <i>Pi16</i>        | <i>Saa3</i>        | <i>Cdo1</i>          | <i>Aspn</i>          | <i>Aqp1</i>           | <i>Acta2</i>               | <i>Stmn1</i>         | <i>Msln</i>              | <i>Cox4i2</i>          |
| <i>Limch1</i>        | <i>Dcn</i>         | <i>Lcn2</i>        | <i>Hsd11b1</i>       | <i>Hhip</i>          | <i>Adh7</i>           | <i>Actc1</i>               | <i>Hmgb2</i>         | <i>Slurp1</i>            | <i>Ndufa4l2</i>        |
| <i>Cst3</i>          | <i>Serpinf1</i>    | <i>Timp1</i>       | <i>Gsta3</i>         | <i>Enpp2</i>         | <i>Mmp2</i>           | <i>Cnn1</i>                | <i>Cks2</i>          | <i>Slpi</i>              | <i>Postn</i>           |
| <i>Fth1</i>          | <i>Clec3b</i>      | <i>Cxcl9</i>       | <i>Gpx3</i>          | <i>Lum</i>           | <i>Wif1</i>           | <i>Myl9</i>                | <i>Ube2c</i>         | <i>Upk3b</i>             | <i>Higd1b</i>          |
| <i>Adamts2</i>       | <i>Ly6c1</i>       | <i>Cxcl10</i>      | <i>Ces1d</i>         | <i>Mustn1</i>        | <i>Bmp7</i>           | <i>Tagln</i>               | <i>Hist1h2ap</i>     | <i>Gpm6a</i>             | <i>Gja4</i>            |
| <i>Sod3</i>          | <i>Cygb</i>        | <i>Ccl2</i>        | <i>Mettl7a1</i>      | <i>P2ry14</i>        | <i>Notum</i>          | <i>Actg2</i>               | <i>2810417H13Rik</i> | <i>Krt19</i>             | <i>Vtn</i>             |
| <i>Cxcl14</i>        | <i>Ccl11</i>       | <i>Ccl7</i>        | <i>Inmt</i>          | <i>Malat1</i>        | <i>Nbl1</i>           | <i>Tpm2</i>                | <i>Birc5</i>         | <i>Clu</i>               | <i>Vsnl1</i>           |
| <i>Gas6</i>          | <i>Il33</i>        | <i>Hp</i>          | <i>Tcf21</i>         | <i>Cfh</i>           | <i>Faim2</i>          | <i>Myh11</i>               | <i>2700094K13Rik</i> | <i>Nkain4</i>            | <i>Fam162b</i>         |
| <i>Npnt</i>          | <i>Entpd2</i>      | <i>Cxcl14</i>      | <i>Aldh1a1</i>       | <i>Vcam1</i>         | <i>Rbp4</i>           | <i>Des</i>                 | <i>Cenpa</i>         | <i>Ezr</i>               | <i>Col8a1</i>          |
| <i>Tnfsf13b</i>      | <i>Htra3</i>       | <i>Mt2</i>         | <i>Npnt</i>          | <i>Hsd11b1</i>       | <i>Igfbp6</i>         | <i>Timp4</i>               | <i>Top2a</i>         | <i>Rspo1</i>             | <i>9230104L09Rik</i>   |
| <i>Slc43a3</i>       | <i>Fbln1</i>       | <i>Fn1</i>         | <i>G0s2</i>          | <i>Inmt</i>          | <i>Smoc2</i>          | <i>Itih4</i>               | <i>Cdk1</i>          | <i>Krt18</i>             | <i>Nrarp</i>           |
| <i>Mfap4</i>         | <i>Igfbp4</i>      | <i>Plac8</i>       | <i>Selenbp1</i>      | <i>C1s1</i>          | <i>Tspan8</i>         | <i>Mustn1</i>              | <i>Cdca3</i>         | <i>Dmkn</i>              | <i>Agtr1a</i>          |
| <i>Hsd11b1</i>       | <i>Cd34</i>        | <i>H2-Q7</i>       | <i>Trf</i>           | <i>Tcf21</i>         | <i>Pi16</i>           | <i>Myl6</i>                | <i>Spc24</i>         | <i>Aqp1</i>              | <i>Notch3</i>          |
| <i>Bgn</i>           | <i>Col14a1</i>     | <i>Mgp</i>         | <i>Slc7a10</i>       | <i>6330403K07Rik</i> | <i>Serpinf1</i>       | <i>Tinagl1</i>             | <i>Cenpw</i>         | <i>Upk1b</i>             | <i>Gucy1b3</i>         |
| <i>Macf1</i>         | <i>Col1a1</i>      | <i>Ifi205</i>      | <i>Gyg</i>           | <i>Rbp1</i>          | <i>Mfap4</i>          | <i>Lmod1</i>               | <i>Tk1</i>           | <i>Sbsn</i>              | <i>Cadm1</i>           |
| <i>Cd9</i>           | <i>Lum</i>         | <i>Sfrp1</i>       | <i>Prdx6</i>         | <i>Cxcl14</i>        | <i>Bgn</i>            | <i>Prss23</i>              | <i>Lockd</i>         | <i>Krt7</i>              | <i>Lmcd1</i>           |
| <i>Maff</i>          | <i>Col1a2</i>      | <i>Sod2</i>        | <i>Gm14964</i>       | <i>Dpep1</i>         | <i>Col15a1</i>        | <i>Dstn</i>                | <i>Cdc20</i>         | <i>Slc9a3r1</i>          | <i>Hbegf</i>           |
| <i>Nbl1</i>          | <i>Col3a1</i>      | <i>Serpina3n</i>   | <i>Pcolce2</i>       | <i>Tgfb1</i>         | <i>Wfdc1</i>          | <i>Sncg</i>                | <i>H2afx</i>         | <i>Bcam</i>              | <i>Gucy1a3</i>         |
| <i>Gyg</i>           | <i>Scara5</i>      | <i>AW112010</i>    | <i>Ppp1r14a</i>      | <i>Clec3b</i>        | <i>Cd34</i>           | <i>Map3k7cl</i>            | <i>Prc1</i>          | <i>AU021092</i>          | <i>Tmem178</i>         |
| <i>Aldh1a1</i>       | <i>Gxylt2</i>      | <i>Ifi27l2a</i>    | <i>Fmo2</i>          | <i>Gpc3</i>          | <i>Tspan11</i>        | <i>Crip1</i>               | <i>Smc4</i>          | <i>Lgals2</i>            | <i>Mcam</i>            |
| <i>Pmp22</i>         | <i>Csrp1</i>       | <i>Rpl39</i>       | <i>Dpep1</i>         | <i>Figf</i>          | <i>Cd9</i>            | <i>Pcp4l1</i>              | <i>Ccnb2</i>         | <i>Slc39a8</i>           | <i>Ebf1</i>            |
| <i>Gadd45b</i>       | <i>Tmem176b</i>    | <i>Irf7</i>        | <i>Col3a1</i>        | <i>Ifi27l2a</i>      | <i>Cd63</i>           | <i>Map1b</i>               | <i>Ccdc34</i>        | <i>Fxyd3</i>             | <i>Kcnk3</i>           |
| <i>Rbp1</i>          | <i>Serpine2</i>    | <i>Serpina3f</i>   | <i>Nebl</i>          | <i>Igfbp5</i>        | <i>Clec3b</i>         | <i>Ramp1</i>               | <i>Cenpf</i>         | <i>Sfrp2</i>             | <i>Emid1</i>           |
| <i>Slc38a5</i>       | <i>Ppp1r14a</i>    | <i>B2m</i>         | <i>Tmsb4x</i>        | <i>C3</i>            | <i>Igfbp7</i>         | <i>Tpm1</i>                | <i>Cdca8</i>         | <i>Krt8</i>              | <i>Art3</i>            |
| <i>Nt5dc2</i>        | <i>Hspb1</i>       | <i>Ifi203</i>      | <i>Aldh2</i>         | <i>Serpig1</i>       | <i>Adh1</i>           | <i>SImap</i>               | <i>Lig1</i>          | <i>Smpd3</i>             | <i>Pdzd2</i>           |
| <i>Pcolce2</i>       | <i>Gm13889</i>     | <i>Rps12</i>       | <i>Figf</i>          | <i>Sparc</i>         | <i>Serpinh1</i>       | <i>Id4</i>                 | <i>Ccna2</i>         | <i>Arhgdib</i>           | <i>Lipg</i>            |
| <i>Tmem176b</i>      | <i>Tmem176a</i>    | <i>Cp</i>          | <i>Fhl1</i>          | <i>Spon1</i>         | <i>Ctsk</i>           | <i>Hspb6</i>               | <i>Tyms</i>          | <i>Lrrn4</i>             | <i>Mgp</i>             |
| <i>Tmem176a</i>      | <i>Npnt</i>        | <i>Lgals3bp</i>    | <i>Macf1</i>         | <i>S100a16</i>       | <i>Eln</i>            | <i>Lmcd1</i>               | <i>Tpx2</i>          | <i>Cldn15</i>            | <i>Pgf</i>             |
| <i>Olml3</i>         | <i>Meg3</i>        | <i>Bst2</i>        | <i>Cdkn2c</i>        | <i>Npnt</i>          | <i>Mfap5</i>          | <i>Cdh13</i>               | <i>Cdkn3</i>         | <i>Wt1</i>               | <i>Bcr</i>             |
| <i>Sept4</i>         | <i>Mfap5</i>       | <i>Rplp1</i>       | <i>Crip1</i>         | <i>Fn1</i>           | <i>Pfpp3</i>          | <i>Fbxl22</i>              | <i>Ccnb1</i>         | <i>Tmem151a</i>          | <i>Rgs4</i>            |
| <i>Gpc3</i>          | <i>Ramp2</i>       | <i>Rpl38</i>       | <i>Ifngr1</i>        | <i>Wisp2</i>         | <i>Sparc</i>          | <i>Sh3bgr</i>              | <i>Rrm2</i>          | <i>Il18r1</i>            | <i>Fth1</i>            |
| <i>Gm13889</i>       | <i>Malat1</i>      | <i>Fam26f</i>      | <i>Wisp2</i>         | <i>Limch1</i>        | <i>Gsn</i>            | <i>Nov</i>                 | <i>Smc2</i>          | <i>Cd200</i>             | <i>Crim1</i>           |
| <i>Eln</i>           | <i>Cdo1</i>        | <i>Rplp2</i>       | <i>Limch1</i>        | <i>Gyg</i>           | <i>Fbln1</i>          | <i>Lims2</i>               | <i>Nusap1</i>        | <i>F11r</i>              | <i>Nostrin</i>         |
| <i>Vcam1</i>         | <i>Gsn</i>         | <i>Rps20</i>       | <i>Dcn</i>           | <i>Igfbp6</i>        | <i>Col1a1</i>         | <i>Slc11a1</i>             | <i>Cenpm</i>         | <i>Aldh1a2</i>           | <i>Pde5a</i>           |
| <i>Lbh</i>           | <i>Mmp23</i>       | <i>Rps24</i>       | <i>Gng11</i>         | <i>Igfbp3</i>        | <i>Sparcl1</i>        | <i>Cbr2</i>                | <i>Racgap1</i>       | <i>Atp1b1</i>            | <i>Epas1</i>           |
| <i>Cebpb</i>         | <i>Limch1</i>      | <i>Tnfaip2</i>     | <i>Spon1</i>         | <i>Mfap4</i>         | <i>Pid1</i>           | <i>Mcam</i>                | <i>Spc25</i>         | <i>Slco2a1</i>           | <i>Pdgfrb</i>          |
| <i>Spon1</i>         | <i>Cxcl14</i>      | <i>Mnda</i>        | <i>Tmem176a</i>      | <i>Slc43a3</i>       | <i>Ppic</i>           | <i>Serpig1</i>             | <i>Mki67</i>         | <i>Cpe</i>               | <i>Esam</i>            |
| <i>G0s2</i>          | <i>Sept4</i>       | <i>H2-T22</i>      | <i>Ifitm2</i>        | <i>Plxdc2</i>        | <i>Clec11a</i>        | <i>Tmsb10</i>              | <i>Kif22</i>         | <i>Cldn10</i>            | <i>BC028528</i>        |
| <i>Sepp1</i>         | <i>Ly6a</i>        | <i>Rpl28</i>       | <i>Igfbp4</i>        | <i>Ifitm1</i>        | <i>Meg3</i>           | <i>Mgp</i>                 | <i>Pbk</i>           | <i>Serpinb6b</i>         | <i>Mfap4</i>           |
| <i>Bmp3</i>          | <i>Tmsb4x</i>      | <i>Ptges</i>       | <i>Smim4</i>         | <i>Lbh</i>           | <i>Tsc22d3</i>        | <i>Bcam</i>                | <i>Ckap2</i>         | <i>Gm20186</i>           | <i>Fmo2</i>            |
| <i>Gpm6b</i>         | <i>Thbs1</i>       | <i>Zbp1</i>        | <i>1810010H24Rik</i> | <i>Tmsb4x</i>        | <i>Olml3</i>          | <i>Adam33</i>              | <i>Knstrn</i>        | <i>Clic3</i>             | <i>Cdkn1c</i>          |
| <i>Col13a1</i>       | <i>Gpx3</i>        | <i>Gbp4</i>        | <i>Kank3</i>         | <i>Adh1</i>          | <i>Pltp</i>           | <i>Actn1</i>               | <i>Mxd3</i>          | <i>Basp1</i>             | <i>Ppp1r14a</i>        |
| <i>Wisp2</i>         | <i>Serpig1</i>     | <i>Rpl41</i>       | <i>Col1a2</i>        | <i>Olml3</i>         | <i>Hspa1a</i>         | <i>Fam129a</i>             | <i>Fam64a</i>        | <i>Prr15l</i>            | <i>Lhfp</i>            |
| <i>Clec11a</i>       | <i>Timp2</i>       | <i>Slc39a14</i>    | <i>Tns1</i>          | <i>Cxcl12</i>        | <i>Ifitm3</i>         | <i>Pdlim4</i>              | <i>Mad2l1</i>        | <i>Cxadr</i>             | <i>Rbp1</i>            |
| <i>Figf</i>          | <i>Scara3</i>      | <i>Ecschr</i>      | <i>Col1a1</i>        | <i>Tmsb10</i>        | <i>Rcn3</i>           | <i>Ppp1r14a</i>            | <i>Pmf1</i>          | <i>Esam</i>              | <i>Gsn</i>             |
| <i>Thbs1</i>         | <i>Dpt</i>         | <i>Mpeg1</i>       | <i>Cd9</i>           | <i>C1ra</i>          | <i>Itgb1l</i>         | <i>Rrad</i>                | <i>Rrm1</i>          | <i>Kdr</i>               | <i>Des</i>             |
| <i>Apoe</i>          | <i>Gyg</i>         | <i>Ubb</i>         | <i>Mfap4</i>         | <i>Pdgfra</i>        | <i>Kcnj8</i>          | <i>Cd9</i>                 | <i>Ckap2l</i>        | <i>Bst1</i>              | <i>Slc9a3r2</i>        |
| <i>Mustn1</i>        | <i>Mylk</i>        | <i>Cd81</i>        | <i>Ppp1r2</i>        | <i>Lox</i>           | <i>Mt1</i>            | <i>Notch3</i>              | <i>Gmnn</i>          | <i>Myrf</i>              | <i>Cystm1</i>          |
| <i>Ogn</i>           | <i>Cd9</i>         | <i>ligp1</i>       | <i>Col13a1</i>       | <i>Ptma</i>          | <i>Pcolce</i>         | <i>Pdlim3</i>              | <i>Cenpe</i>         | <i>Cyp2s1</i>            | <i>Mfge8</i>           |
| <i>Lgmn</i>          | <i>Fth1</i>        | <i>Pla1a</i>       | <i>Gstm1</i>         | <i>Gng11</i>         | <i>Paqr6</i>          | <i>Csrp1</i>               | <i>Lmnb1</i>         | <i>Prr15</i>             | <i>Malat1</i>          |
